# Supplementary material
Source: PubMed Central journal article supplement (PMC7122060)
Supplement: NIHMS1567688-supplement-Supplementary_Material.pdf [file NIHMS1567688-supplement-Supplementary_Material.pdf]

# **Supplement Digital Content**

## **Table, Supplemental Digital Content 1**

**Table, Supplemental Digital Content 1. Diet Descriptions**

**Supplemental Digital Content 1. Nutrient composition of the two diets used in DASH-Sodium**

| Nutrient                              | Control diet | DASH diet |
|---------------------------------------|--------------|-----------|
| Total fat, % energy                   | 36           | 26        |
| Saturated fatty acids, % energy       | 15           | 5         |
| Monounsaturated fatty acids, % energy | 13           | 13        |
| Polyunsaturated fatty acid, % energy  | 8            | 8         |
| Protein, % energy                     | 15           | 18        |
| Carbohydrate, % energy                | 49           | 56        |
| Cholesterol, mg                       | 300          | 150       |
| Fiber, g                              | 11           | 32        |
| Potassium, mg                         | 1,700        | 4,700     |
| Magnesium, mg                         | 160          | 500       |
| Calcium, mg                           | 450          | 1,250     |
| Lower sodium, mg                      | 1,150        | 1,150     |
| Intermediate sodium, mg               | 2,300        | 2,300     |
| Higher sodium, mg                     | 3,450        | 3,450     |

Mean (SD). Values calculated using Moore's Extended Nutrition (MENu) database (version 3.1, 1997; Pennington Biomedical Research Foundation, Baton Rouge, La).<sup>46</sup> These energy and nutrient values were based on an energy target of level of 2100 kcal.<sup>47</sup>
